# Supplementary material for: Structure and number of mating pheromone genes is closely linked to sexual reproductive strategy in Huntiella
Source: Springer Nature journal article supplement (doi:10.1186/s12864-023-09355-9), 2023-05-13
Supplement: 12864_2023_9355_MOESM1_ESM.pdf [file 12864_2023_9355_MOESM1_ESM.pdf]

FIGURE S1

A

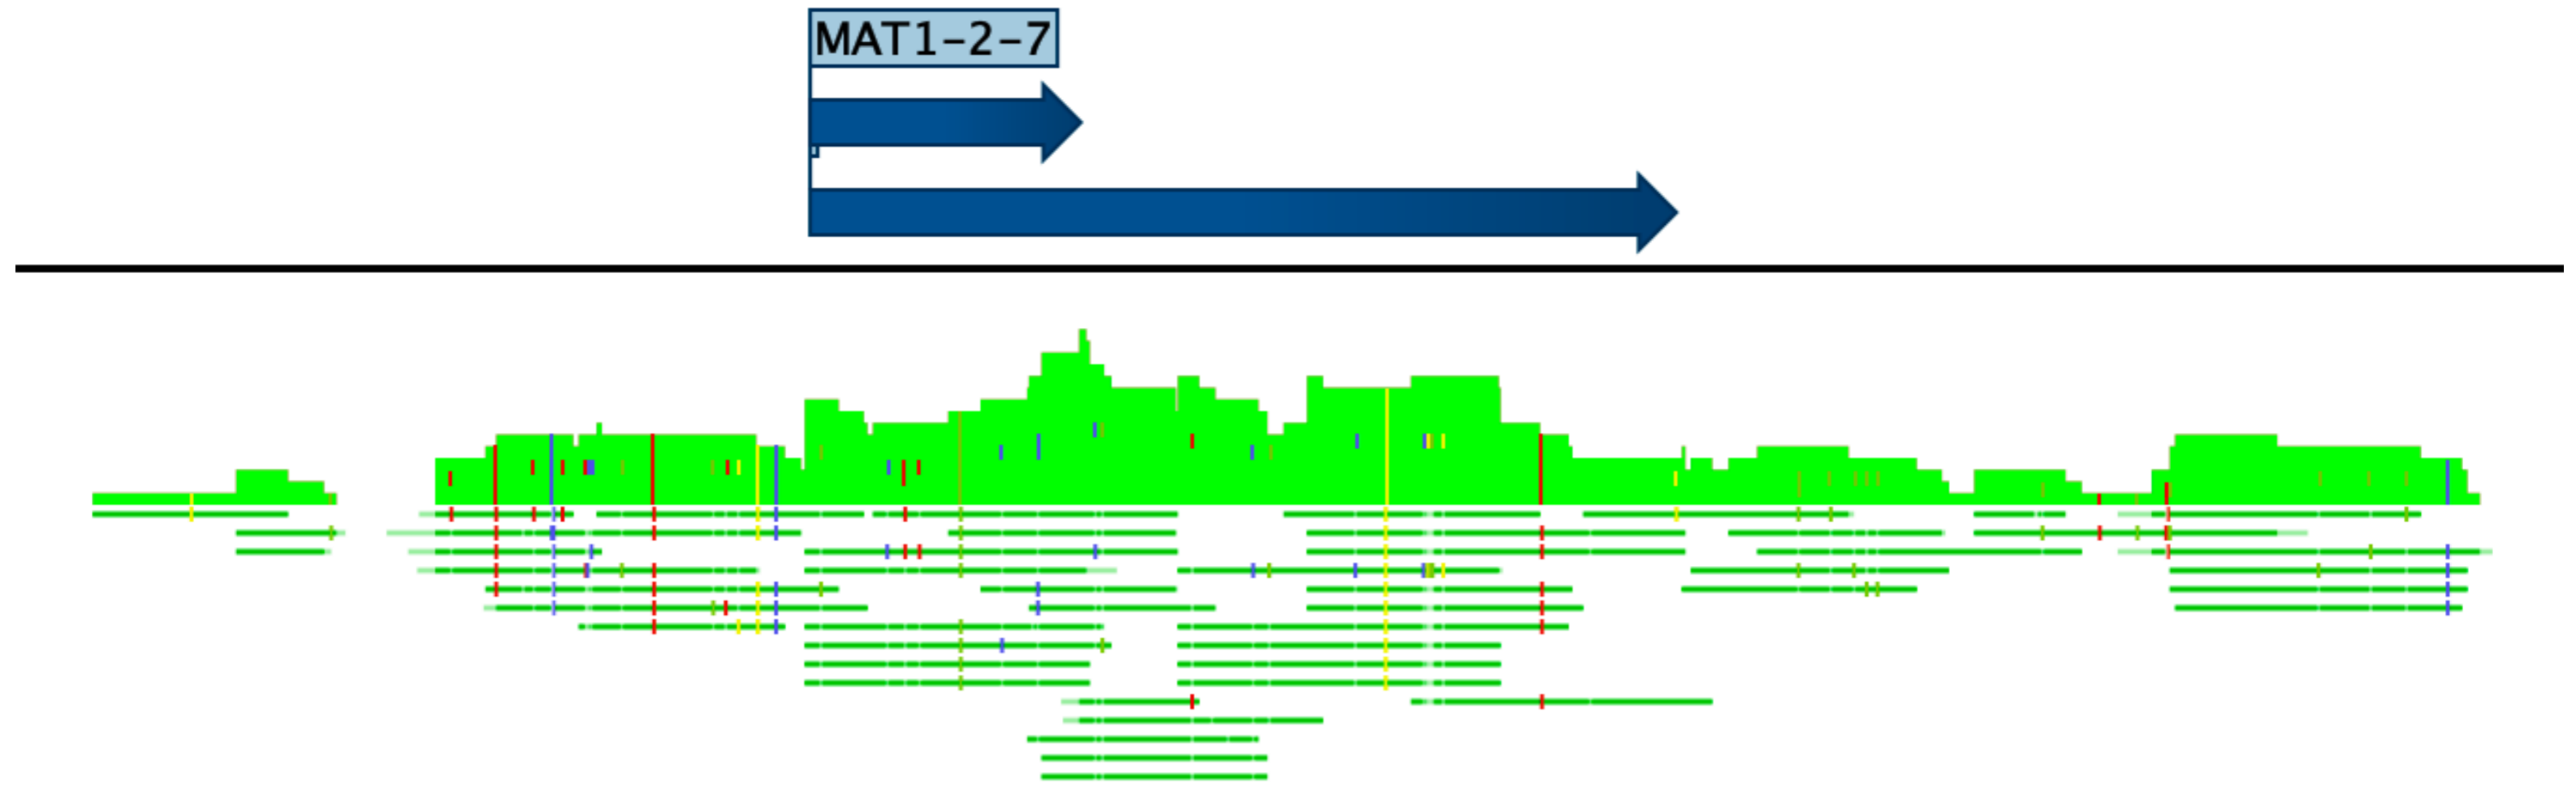

B

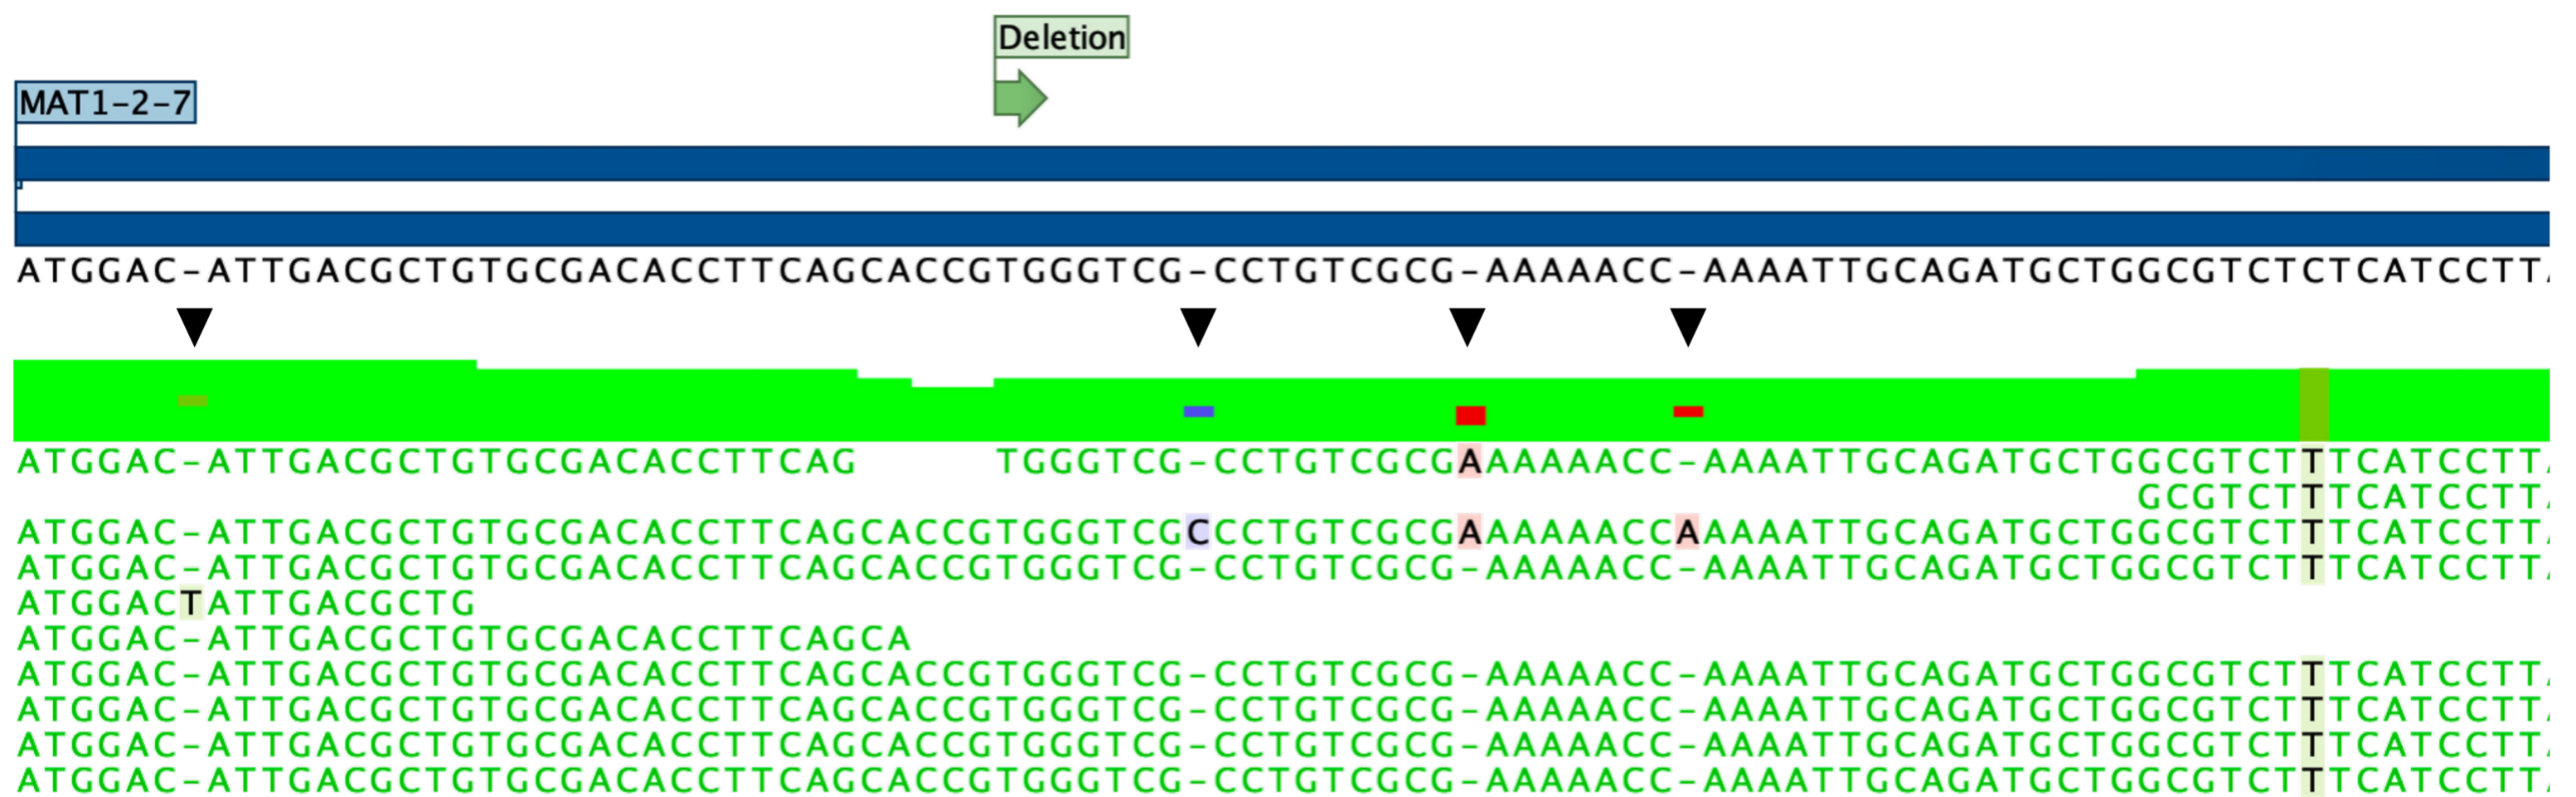

C

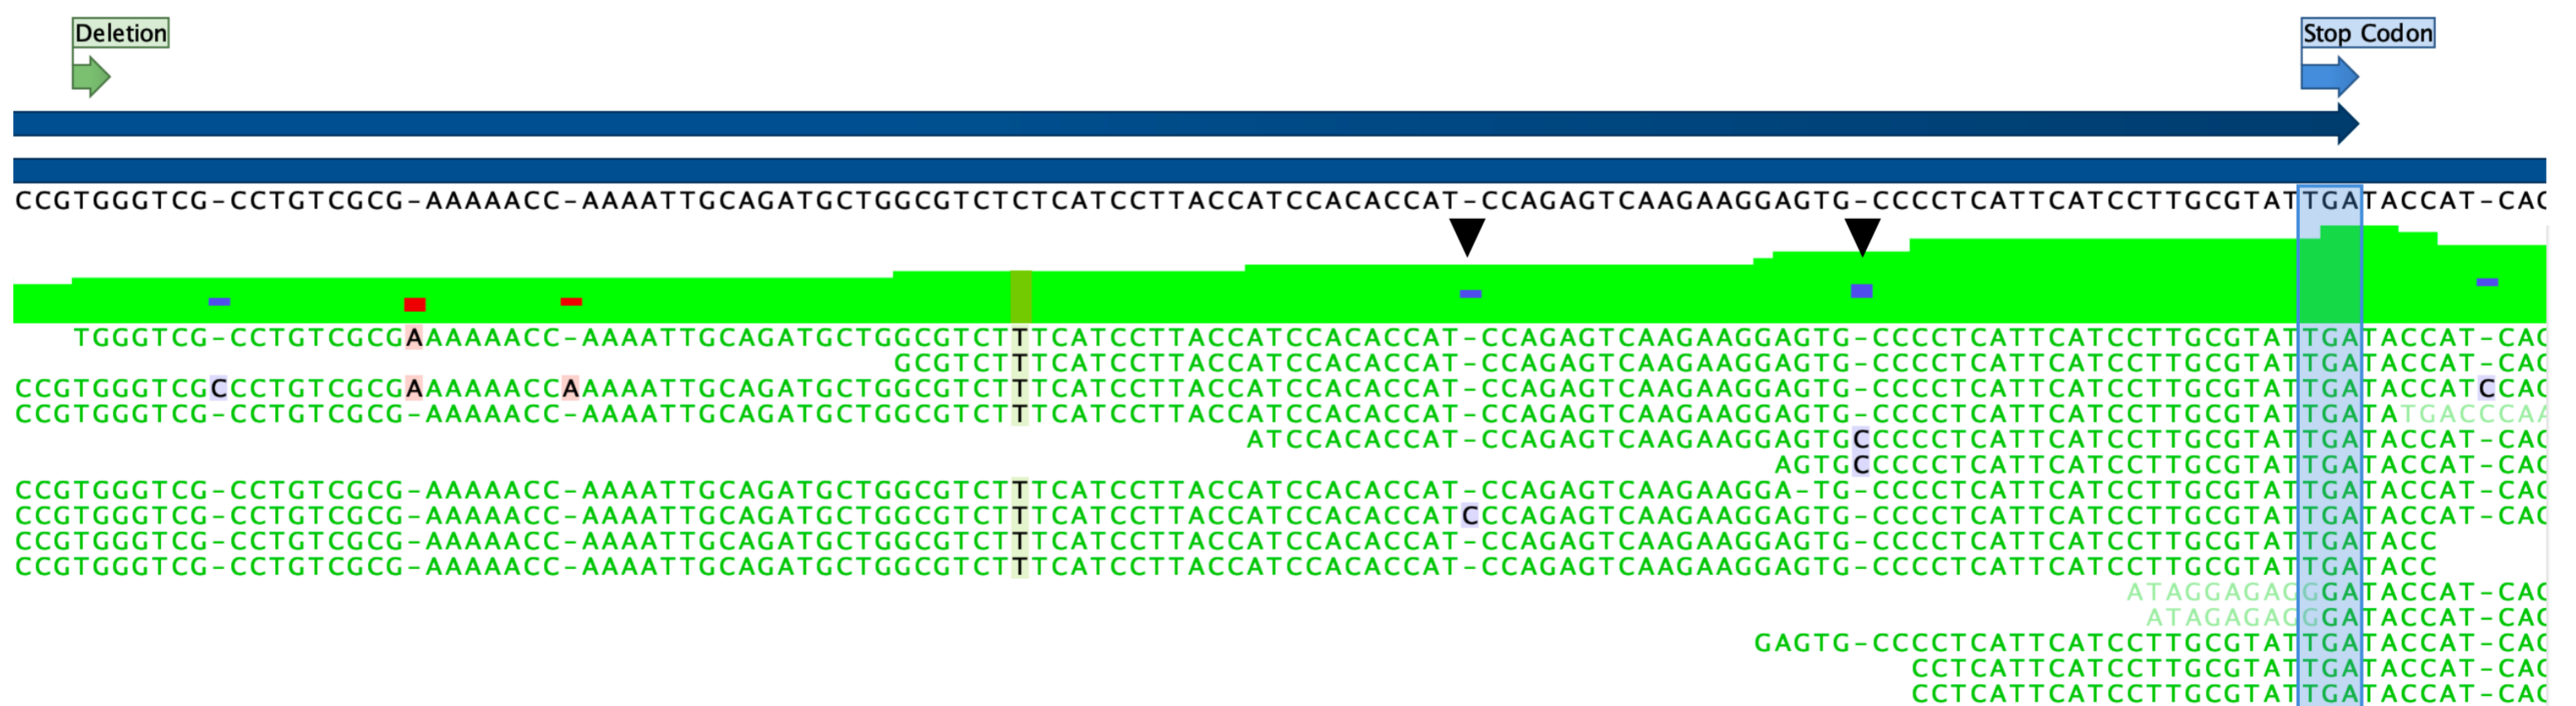

**Fig S1:** RNA mapping to confirm the single nucleotide deletion in the *H. moniliformis* MAT1-2-7. This mapping was generated using three sets of RNAseq data from a sporulating *H. moniliformis* isolate (Wilson et al 2018). A) Overview of the mapping across the entire gene. B) Mapping of the 5' region of the gene, indicating the start codon as well as the region where the deletion took place (indicated by the light green annotation). C) Mapping of the 3' region of the gene, indicating the region where the deletion took place as well as the in frame stop codon (indicated by the light blue annotation and box). There are various SNPs apparent when comparing the RNAseq reads to the assembled contig. Some of these (particularly those indicated with a black triangles) are likely sequencing errors produced during the transcriptome sequencing- especially considering they often occur in homopolymeric regions. These errors are often only supported by one or two reads. The mapping was produced using the CLC Genomics Workbench V22.0 Map Reads to Contigs function within the De Novo Sequencing module. The parameters were all set to default, except the minimum length and similarity fractions, which were each set to 0.9.

FIGURE S2

| Species                | Protein structure                                                                                                                                                                                                                                                                                                                                                                                                                                                                                                                                                                |
|------------------------|----------------------------------------------------------------------------------------------------------------------------------------------------------------------------------------------------------------------------------------------------------------------------------------------------------------------------------------------------------------------------------------------------------------------------------------------------------------------------------------------------------------------------------------------------------------------------------|
| <i>H. abstrusa</i>     | a1 -----RGVDQSSG <b>CSVM</b> RGVDQSSG <b>CSVM</b> RGVDQSSG <b>CTLM</b> RGVDQSSG <b>CTLM</b><br>a2 -----RGVDQSSG <b>CSVM</b> ---<br>a3 -----RGVDQSSG <b>CSVM</b> RGVDQSSG <b>CSVM</b> RGVDQSSG <b>CTVM</b> RGVDQSSG <b>CTVM</b><br>a4 -----RSINQSSP <b>CTVM</b> RSINQSSP <b>CNVM</b><br>a5 -----RTVNQSGP <b>CNVM</b> RTVNQSGP <b>CNVM</b> RTVNQSGP <b>CNVM</b> RTVNQSGP <b>CNVM</b><br>a6 -----RTVNQSGP <b>CNVM</b> RTVNQSGP <b>CNVM</b> RTVNQSGP <b>CNVM</b> RTVNQSGP <b>CNVM</b><br>a7 -----RTVNQSGP <b>CNVM</b> RTVNQSGP <b>CNVM</b> RTVNQSGP <b>CNVM</b> RTVNQSGP <b>CNVM</b> |
| <i>H. omanensis</i>    | a1 -----RGVDQSNP <b>CAVM</b> RGVDQSNP <b>CAVM</b> RGVDQSNP <b>CTVM</b> RGVDQSNP <b>CTLM</b><br>a2 -----RGVDQSN <b>CAVM</b> RGVDQSN <b>CTVM</b> --<br>a3 -----RGVDQSNP <b>CAVM</b> RGVDQSNP <b>CAVM</b> RGVDQSNP <b>CAVM</b> RGVDQSNP <b>CTVM</b><br>a4 -----RTVNQSSP <b>CTVM</b> RSINQSTP <b>CNVM</b><br>a5 -----RVANQSNP <b>CNVM</b> RTANQSNP <b>CTVM</b> RTGNQSNP <b>CVVM</b> RTGNQSNP <b>CNVM</b><br>a6 MRTGNQSNP <b>CTVM</b> RTGNQSNP <b>CVVM</b> RTGNQSNP <b>CNVM</b><br>a7 --- RVANQSNP <b>CNVM</b>                                                                        |
| <i>H. bhutanensis</i>  | a1 -----RGVDQSNP <b>CNVM</b> RGVDQSNP <b>CAVM</b> RGVDQSNP <b>CTVM</b><br>a2 -----RGVDQSNP <b>CNVM</b> --<br>a3 ---RGVDQSNP <b>CSVM</b> RGVDQSNP <b>CAVM</b> RGVDQSNP <b>CTVM</b><br>a4 -----RTFNQSSP <b>CTVM</b> RTINQSSP <b>CNVM</b><br>a5 ---RAASQSNP <b>CNVM</b> RAASQSNP <b>CTVM</b> RAASQSNP <b>CTVM</b> RAASQSNP <b>CNVM</b><br>a6 ---RAASQSNP <b>CNVM</b> RAASQSNP <b>CTVM</b> RAASQSNP <b>CTVM</b> RAASQSNP <b>CNVM</b>                                                                                                                                                 |
| <i>H. decipiens</i>    | a1 -----RGVDQSN <b>CSVM</b> RGVDQSN <b>CTVM</b> RGVDQSN <b>CTVM</b> RGVNQSN <b>CTVM</b><br>RGVNQSN <b>CTLM</b><br>a2 -----RGVDQSN <b>CAVM</b> --<br>a3 -----RGVDQSN <b>CSVM</b> RGVDQSN <b>CTVM</b> RGVDQSN <b>CTVM</b> RGVNQSN <b>CTLM</b><br>a4 -----RTVNQSGP <b>CTVM</b> RSINQSSP <b>CNVM</b>                                                                                                                                                                                                                                                                                 |
| <i>H. savannae</i>     | a1 -----RGVDQSTP <b>CSVM</b> RGVDQSTP <b>CNVM</b> RGVDQSTP <b>CNVM</b> RGVDQSTP <b>CTVM</b><br>a2 -----RGVDQSTP <b>CSVM</b> --<br>a3 ---RGVDQSTP <b>CSVM</b> RGVDQSTP <b>CNVM</b> RGVDQSTP <b>CNVM</b> RGVDQSTP <b>CNVM</b><br>a4 -----RSVNQSTP <b>CTVM</b> RSINQSTP <b>CNVM</b><br>a5 ---RGVNQSTP <b>CNVM</b> RGVNQSTP <b>CNVM</b> RGVNQSTP <b>CNVM</b> RGVNQSTP <b>CNVM</b><br>a6 ---RGVNQSTP <b>CNVM</b> RGVNQSTP <b>CNVM</b> RGVNQSTP <b>CNVM</b> RGVNQSTP <b>CNVM</b><br>a7 ---RGVNQSTP <b>CNVM</b> RGVNQSTP <b>CNVM</b> RGVNQSTP <b>CNVM</b> RGVNQSTP <b>CNVM</b>          |
| <i>H. moniliformis</i> | a4 -----RGVTQAPP <b>CNVM</b> RGVTQAPP <b>CNVM</b>                                                                                                                                                                                                                                                                                                                                                                                                                                                                                                                                |
| <i>H. fecunda</i>      | a3 ---RGVTQAPP <b>CNVM</b><br>a4 -----RGVTQAPP <b>CNVM</b> RGVTQAPP <b>CNVM</b>                                                                                                                                                                                                                                                                                                                                                                                                                                                                                                  |
| <i>H. tyalla</i>       | a4 -----RGVTQAPP <b>CNVM</b> RGVTQAPP <b>CNVM</b>                                                                                                                                                                                                                                                                                                                                                                                                                                                                                                                                |

**Fig S2:** The structure of the *Huntia* a-factor pheromone proteins and the sequence of the putative mature repeats. The repeat units are represented by coloured squares and while the structure schematics are not drawn to scale, they are representative of the length of the non-repeat harbouring N-terminal.

FIGURE S3

|                        |            |            |            |            |            |            |            |            |     |
|------------------------|------------|------------|------------|------------|------------|------------|------------|------------|-----|
|                        |            |            | 20         |            | 40         |            | 60         |            | 80  |
| <i>H. abstrusa</i>     | ATGGCCGCTA | TCAAGAACAC | CACCTCCTCC | AAGAACGCCG | CCCGCGGCGT | CGACCAATCC | AGCGGATGCA | GCGTCATGCG | 80  |
| <i>H. omanensis</i>    | ATGGCCGCTA | TCAAGAACAC | CACCACCTCC | AAGAACGCCG | CCCGCGGCGT | TGACCAGTCC | AACCCCTGCG | CCGTCATGCG | 80  |
| <i>H. bhutanensis</i>  | ATGGCCGCTA | TCAAGAACAT | CACCTCCTCC | AAGAACGCCG | CCCGCGGCGT | CGACCAGTCC | AACCCGTGCA | ACGTCATGCG | 80  |
| <i>H. decipiens</i>    | ATGGCCGCTA | TCAAGAACAT | CACCTCCTCC | AAGCACGCCG | CCCGCGGCGT | CGACCAATCC | AACGGATGCT | CCGTCATGCG | 80  |
| <i>H. savannae</i>     | ATGGCCTCTG | TCAAGAACAT | CACCTCCTCC | AAGCACGCCG | CCCGCGGCGT | CGACCAATCC | ACCCCTTGCA | GCGTCATGCG | 80  |
| <i>H. moniliformis</i> | ATGGCCTCCG | TCAAGAACAC | TACCTCTTCC | AAGACTGCCG | ACCGTGGCGT | CACCCAGGCT | CCCCCGTGAA | ATGTTATGCG | 80  |
| <i>H. fecunda</i>      | ATGGCCTCCG | TCAAGAACAC | TACCTCTTCC | AAGACTGCCG | ACCGTGGCGT | CACCCAGGCT | CCCCCGTGAA | ATGTTATGCG | 80  |
| <i>H. tyalla</i>       | ATGGCCTCCG | TCAAGAACAC | TACCTCTTCC | AAGACTGCCG | ACCGTGGCGT | CACCCAGGCT | CCCCCGTGAA | ATGTTATGCG | 80  |
|                        |            |            | 100        |            | 120        |            | 140        |            | 160 |
| <i>H. abstrusa</i>     | TGGCGTTGAC | CAGTCCAGCG | GTTGCTCCGT | CATGCGCGGT | GTTGACCAGT | CCAGCGGCTG | CACCCTCATG | CGCGGTGTTG | 160 |
| <i>H. omanensis</i>    | CGGCGTTGAC | CAGTCCAACC | CCTGCGCTGT | CATGCGCGGC | GTCGACCAGT | CCAACCCCTG | CACTGTCATG | CGCGGTGTTG | 160 |
| <i>H. bhutanensis</i>  | TGGTGTTGAC | CAGTCCAACC | CGTGCGCTGT | CATGCGCGGT | GTTGATCAGT | CCAACCCCTG | CACCGTCATG | -----      | 150 |
| <i>H. decipiens</i>    | CGGTGTTGAC | CAATCCAACG | GTTGCACCGT | CATGCGCGGT | GTTGACCAGT | CCAACGGCTG | CACTGTCATG | CGCGGTGTTA | 160 |
| <i>H. savannae</i>     | TGGTGTTGAC | CAGTCTACCC | CGTGCAACGT | CATGCGTGGT | GTTGACCAGT | CCACCCCGTG | CAACGTCATG | CGCGGTGTTG | 160 |
| <i>H. moniliformis</i> | CGGCGTTACC | CAGGCCCCGC | CTTGCAACGT | CATGCGTGGT | GTTACCCAGG | CTCCTCCCTG | CAACGTCATG | -----      | 150 |
| <i>H. fecunda</i>      | CGGCGTTACC | CAGGCCCCGC | CTTGCAACGT | CATG-----  | -----      | -----      | -----      | -----      | 114 |
| <i>H. tyalla</i>       | CGGCGTTACC | CAGGCCCCGC | CTTGCAACGT | CATGCGCGGC | GTTACCCAGG | CCCCGCCTTG | CAACGTCATG | CGTGGTGTTA | 160 |
|                        |            |            | 180        |            | 200        |            | 220        |            |     |
| <i>H. abstrusa</i>     | ACCAGTCCAG | CGG-----   | -----      | -----      | -----T     | TGCACCCTCA | TGTAA      | 189        |     |
| <i>H. omanensis</i>    | ACCAGTCCAA | C-----     | -----      | -----      | -----CCG   | TGCACCCTCA | TGTAA      | 189        |     |
| <i>H. bhutanensis</i>  | -----      | -----      | -----      | -----      | -----      | -----      | --TAA      | 153        |     |
| <i>H. decipiens</i>    | ACCAGTCCAA | CGGCTGCACT | GTCATGCGCG | GTGTTAACCA | GTCCAACGGT | TGCACCCTCA | TGTAA      | 225        |     |
| <i>H. savannae</i>     | ACCAGTCCAC | CCCTTGCAAC | G-----     | -----      | -----      | -----TCA   | TGTAA      | 189        |     |
| <i>H. moniliformis</i> | -----      | -----      | -----      | -----      | -----      | -----      | --TAA      | 153        |     |
| <i>H. fecunda</i>      | -----      | -----      | -----      | -----      | -----      | -----      | --TAA      | 117        |     |
| <i>H. tyalla</i>       | CCCAGGCTCC | TCCCTGCAAC | G-----     | -----      | -----      | -----TCA   | TGTAA      | 189        |     |

**Fig S3:** An alignment of the *a1* a-factor pheromone factor genes from all eight *Huntia* species considered in this study. All three unisexual *Huntia* species harboured a mutation that converted the TGC codon (Cys) into the TGA stop codon. This alignment was produced using the CLC Main Workbench V22.0 Create Alignment function within the Alignments and Trees module. The parameters were all set to default.



FIGURE S5

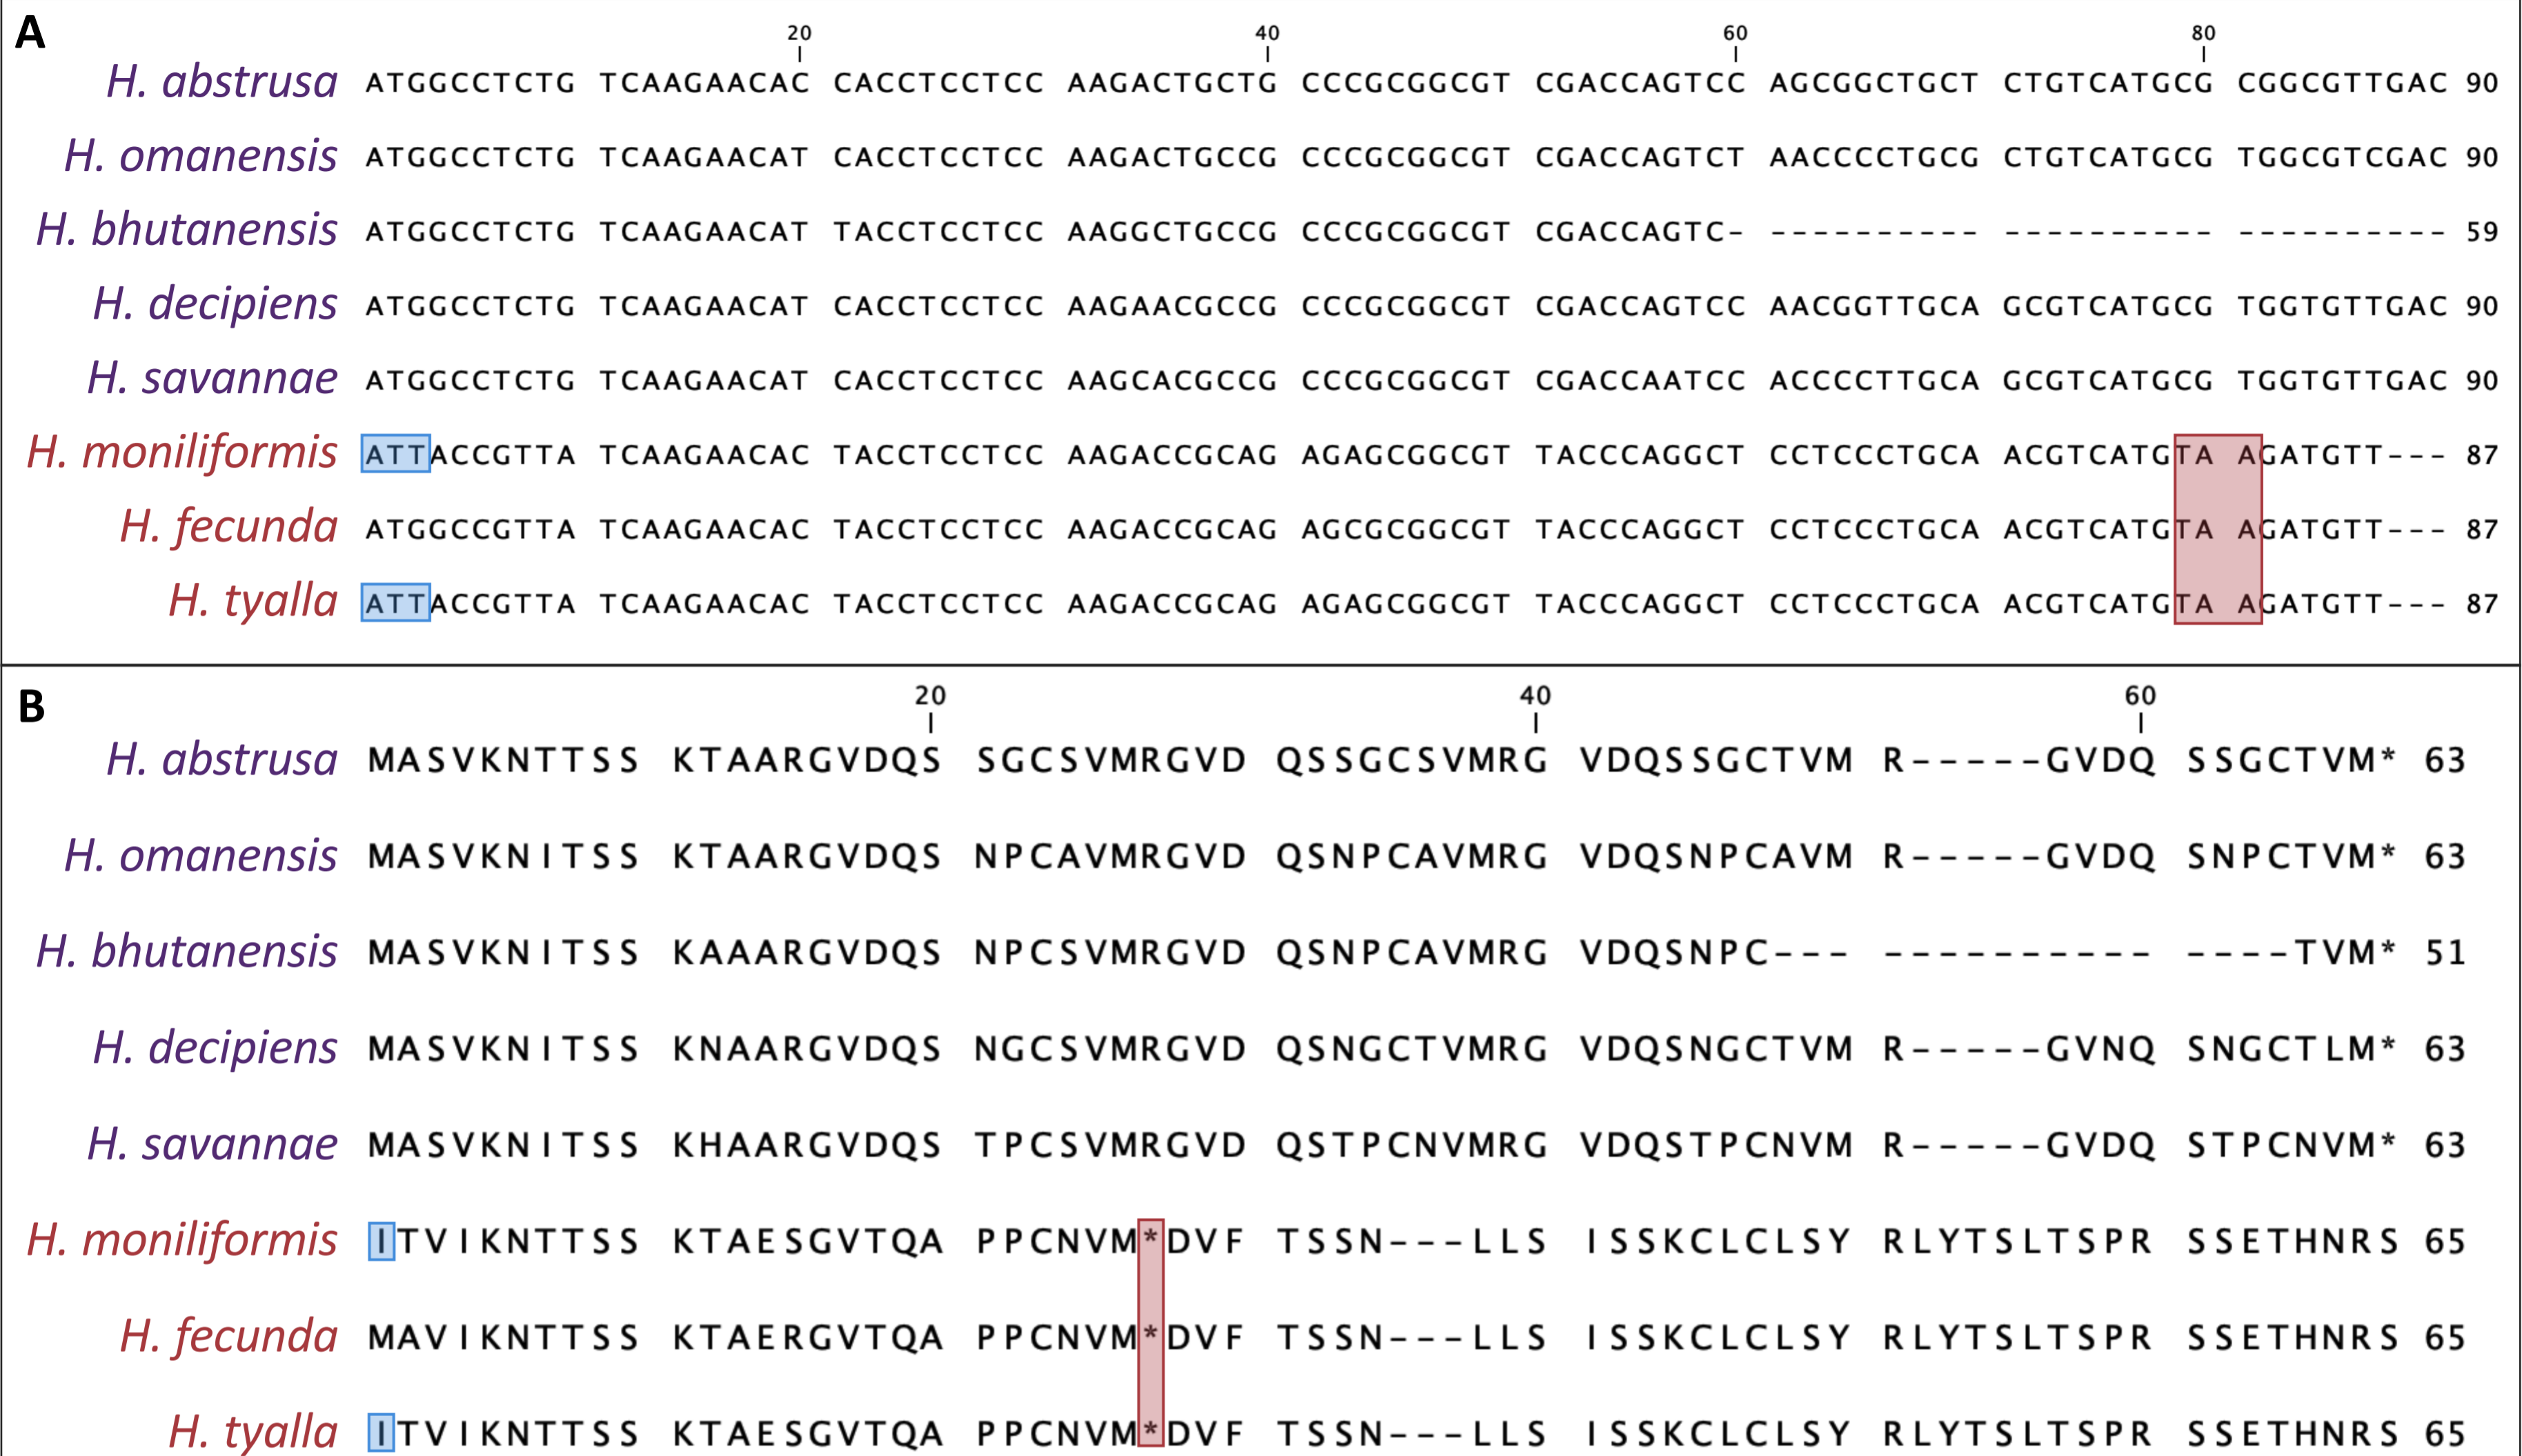

**Fig S5:** An alignment of the  $\alpha 3$  a-factor pheromone from all eight *Huntia* species considered in this study. All three unisexual species harboured a stop codon at the position corresponding to the 27th amino acid of the protein, a codon not present in the heterothallic species (indicated by the red blocks). Additionally, *H. moniliformis* and *H. tyalla* also harboured a mutation that converted the ATG codon (start methionine) into an ATT codon (Ile), potentially producing an untranslatable mRNA (indicated by the light blue blocks). A) A gene alignment of the first 90 nucleotides of the  $\alpha 3$  a-factor pheromone gene. B) A protein alignment of the full-length  $\alpha 3$  a-factor pheromone protein. This alignment was produced using the CLC Main Workbench V22.0 Create Alignment function within the Alignments and Trees module. The parameters were all set to default.

FIGURE S6

A

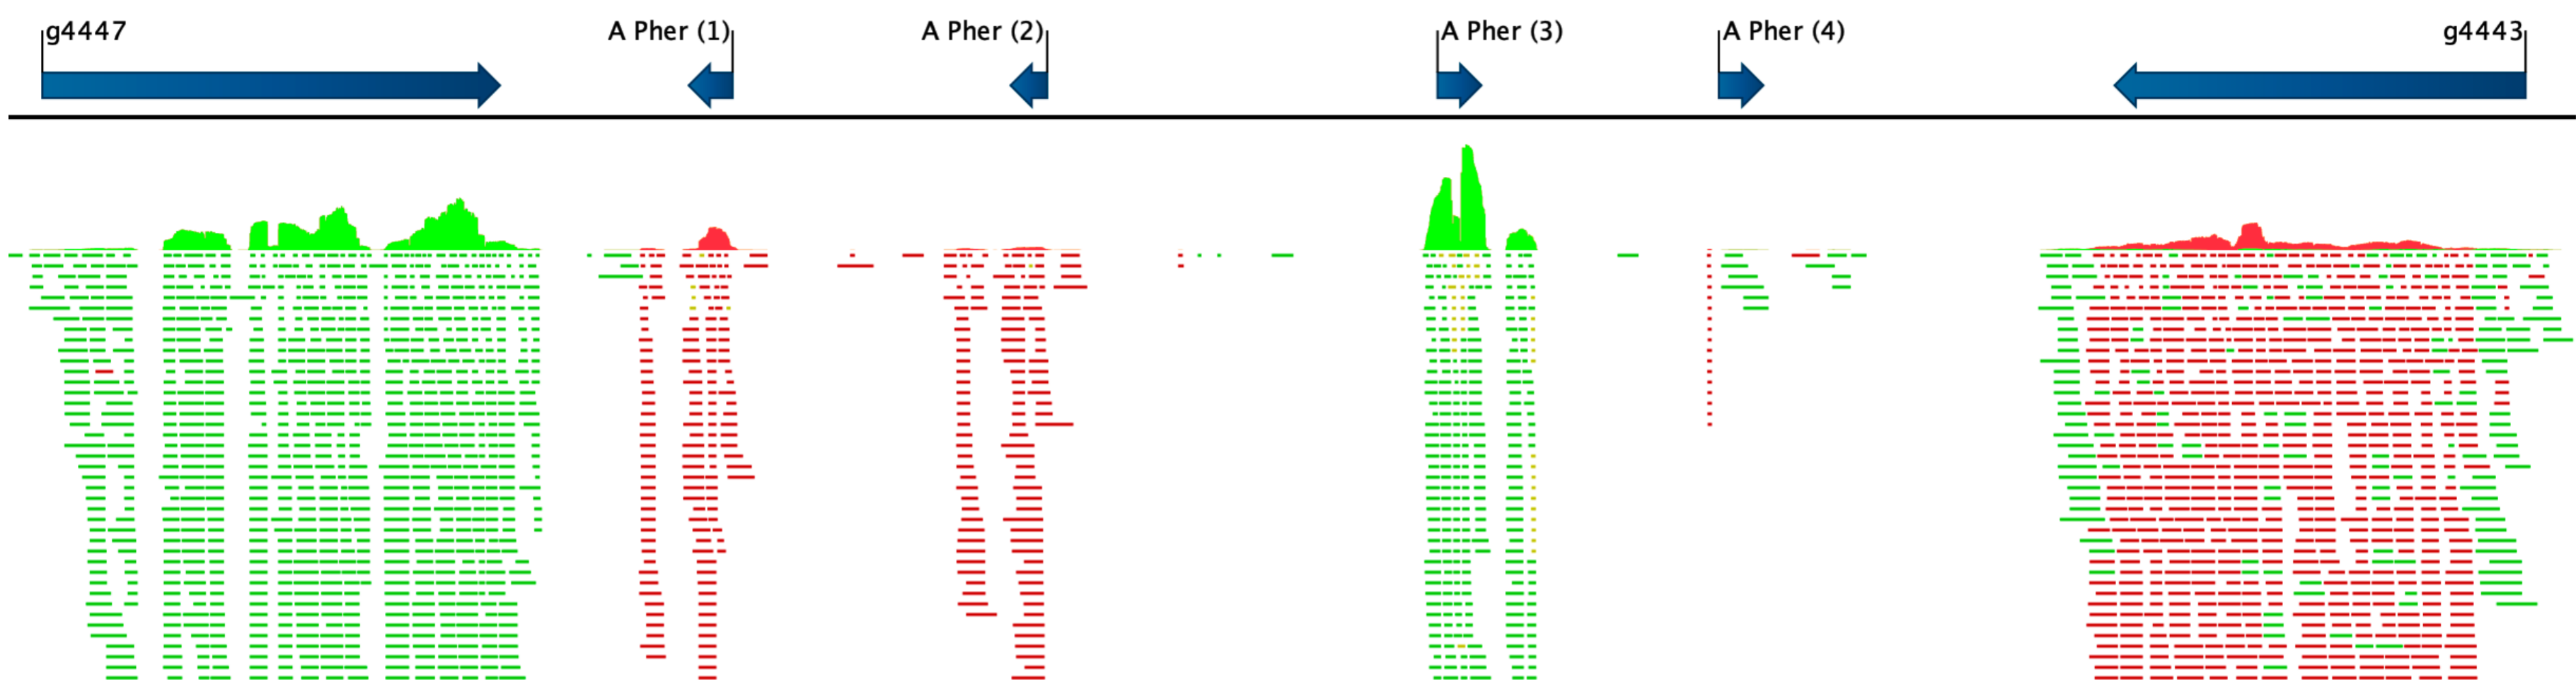

B

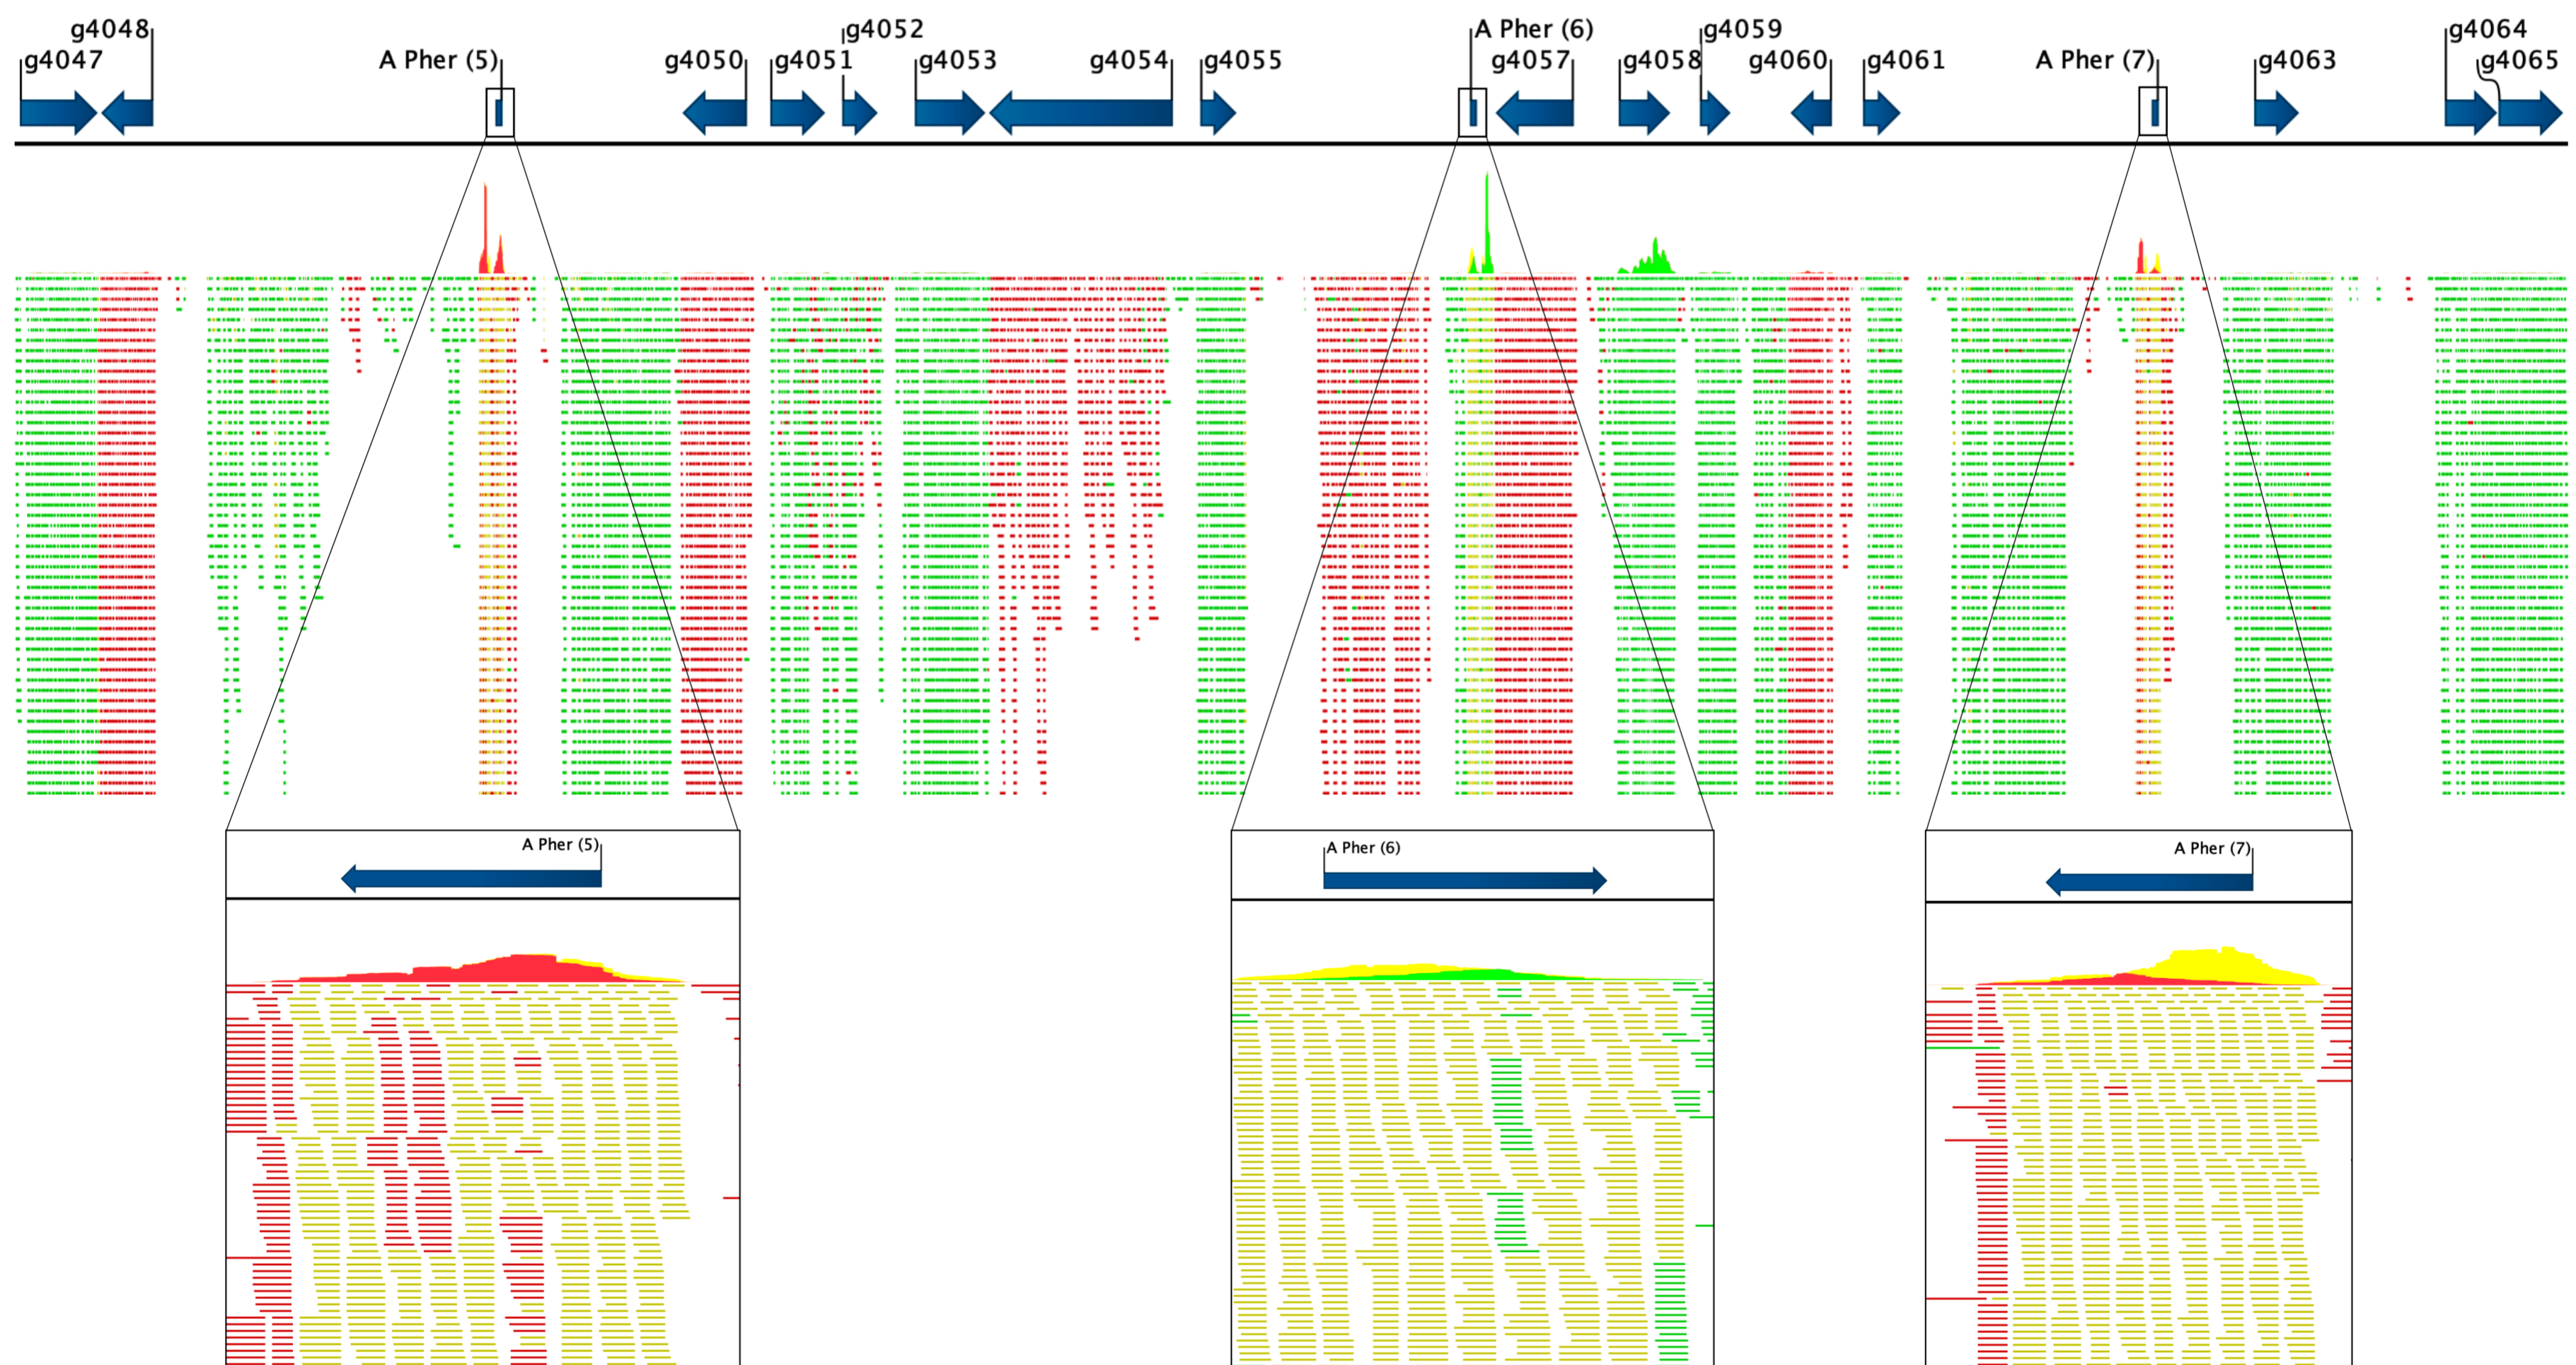

**Fig S6:** RNA mapping to determine expression of the multiple a-factor pheromone genes from *H. abstrusa*. A) Expression of the genes present at the first a-factor pheromone locus. B) Expression of the genes present at the second a-factor pheromone locus, with inserts zoomed in on the three a-factor pheromones. The mappings were produced using the CLC Genomics Workbench V22.0 Map Reads to Contigs function within the De Novo Sequencing module. The parameters were all set to default, except the minimum length and similarity fractions. These values were both set to 1.0.

FIGURE S7

A

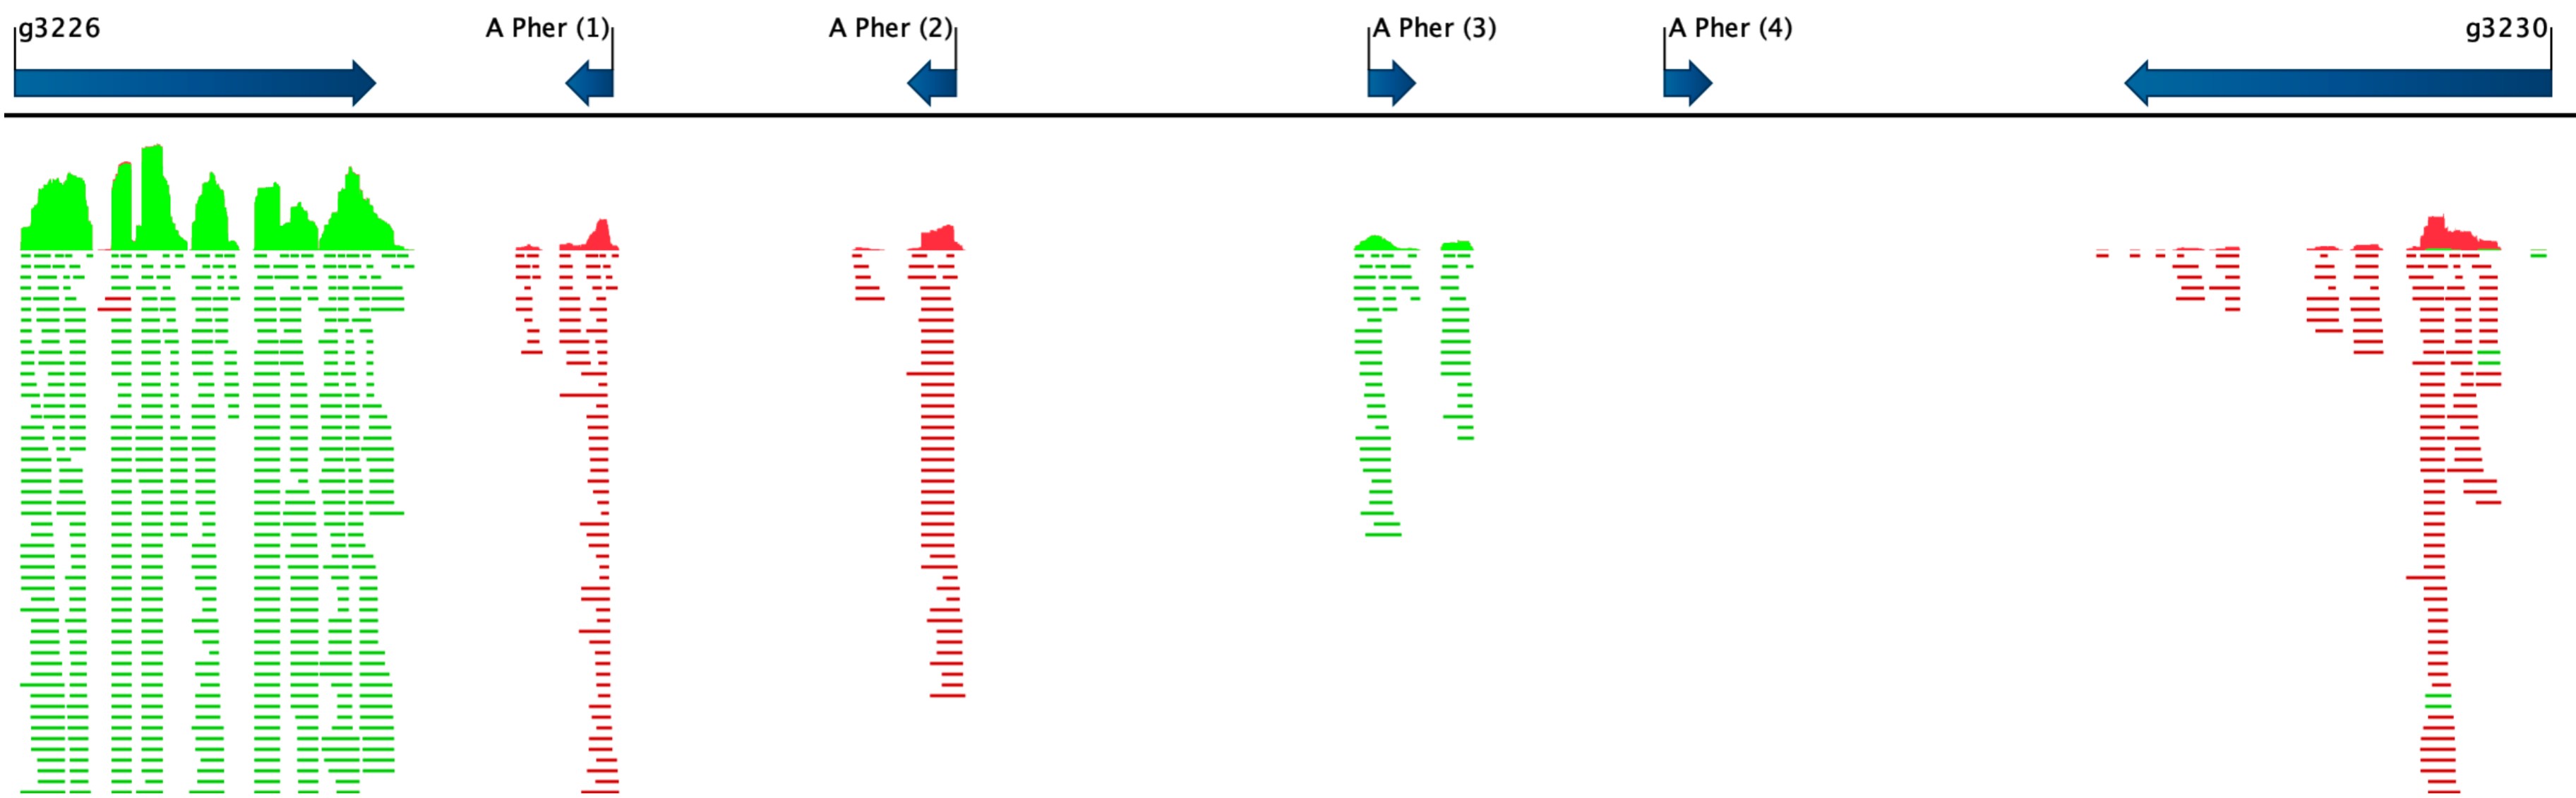

B

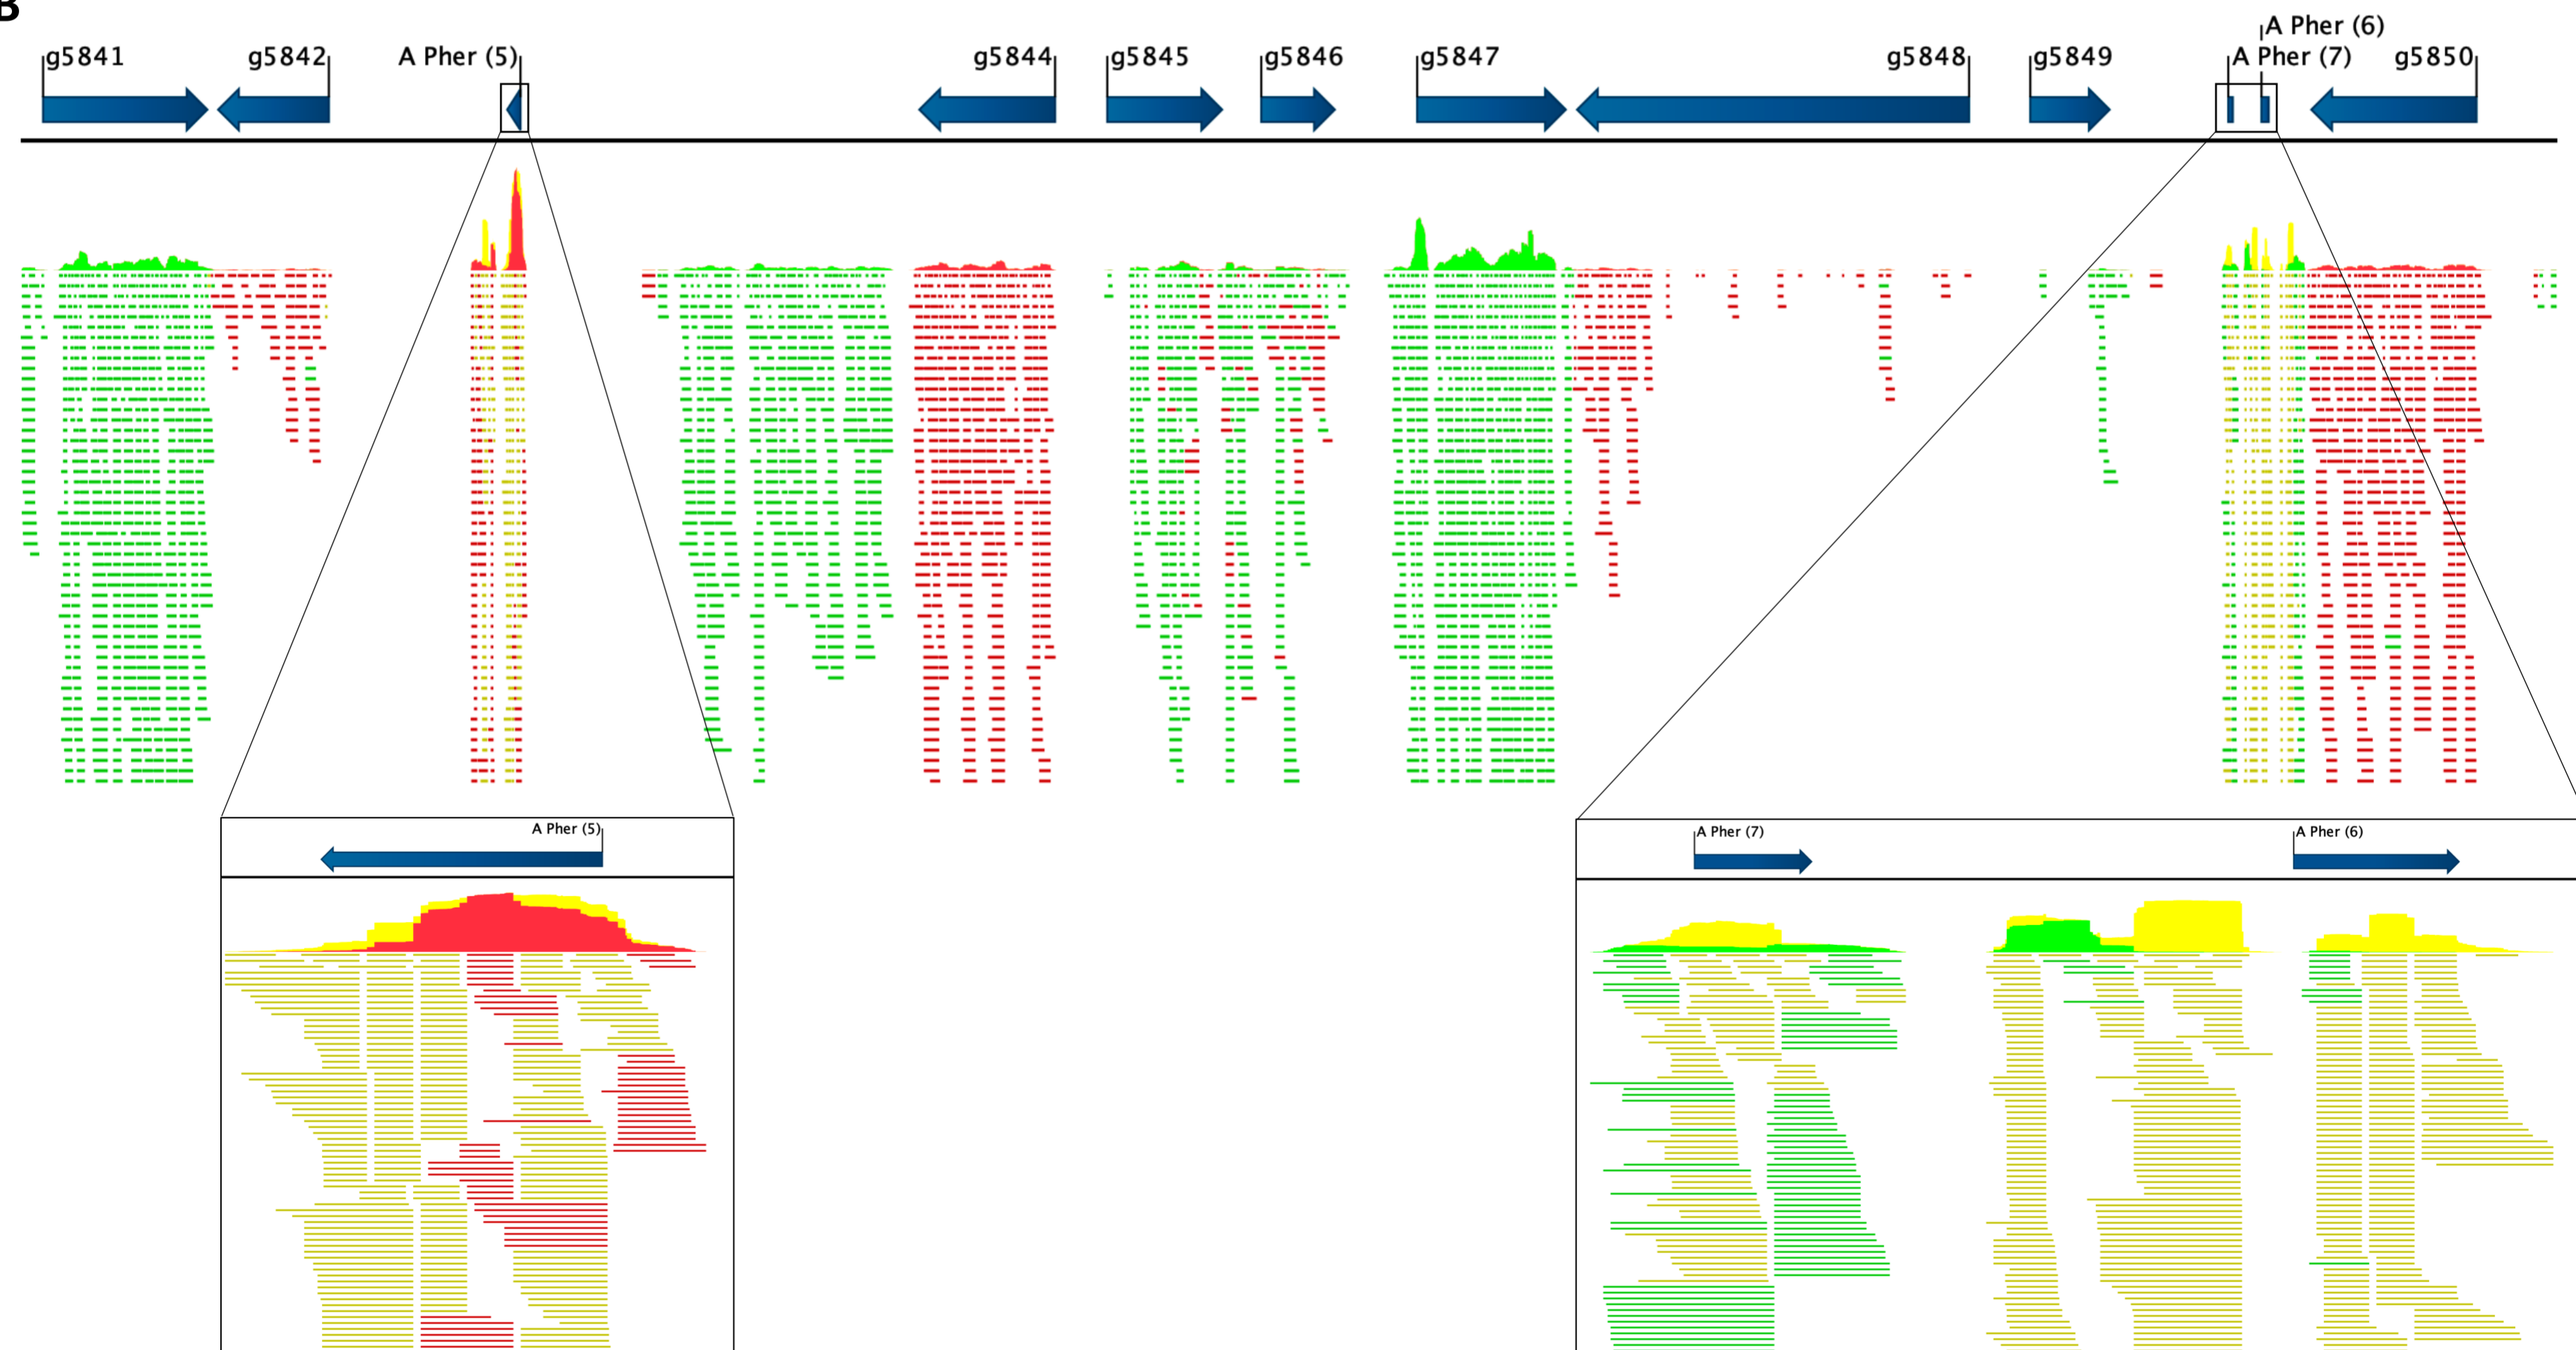

**Fig S7:** RNA mapping to determine expression of the multiple a-factor pheromone genes from *H. omanensis*. A) Expression of the genes present at the first a-factor pheromone locus. B) Expression of the genes present at the second a-factor pheromone locus, with inserts zoomed in on the three a-factor pheromones. The mappings were produced using the CLC Genomics Workbench V22.0 Map Reads to Contigs function within the De Novo Sequencing module. The parameters were all set to default, except the minimum length and similarity fractions. These values were both set to 1.0.

FIGURE S8

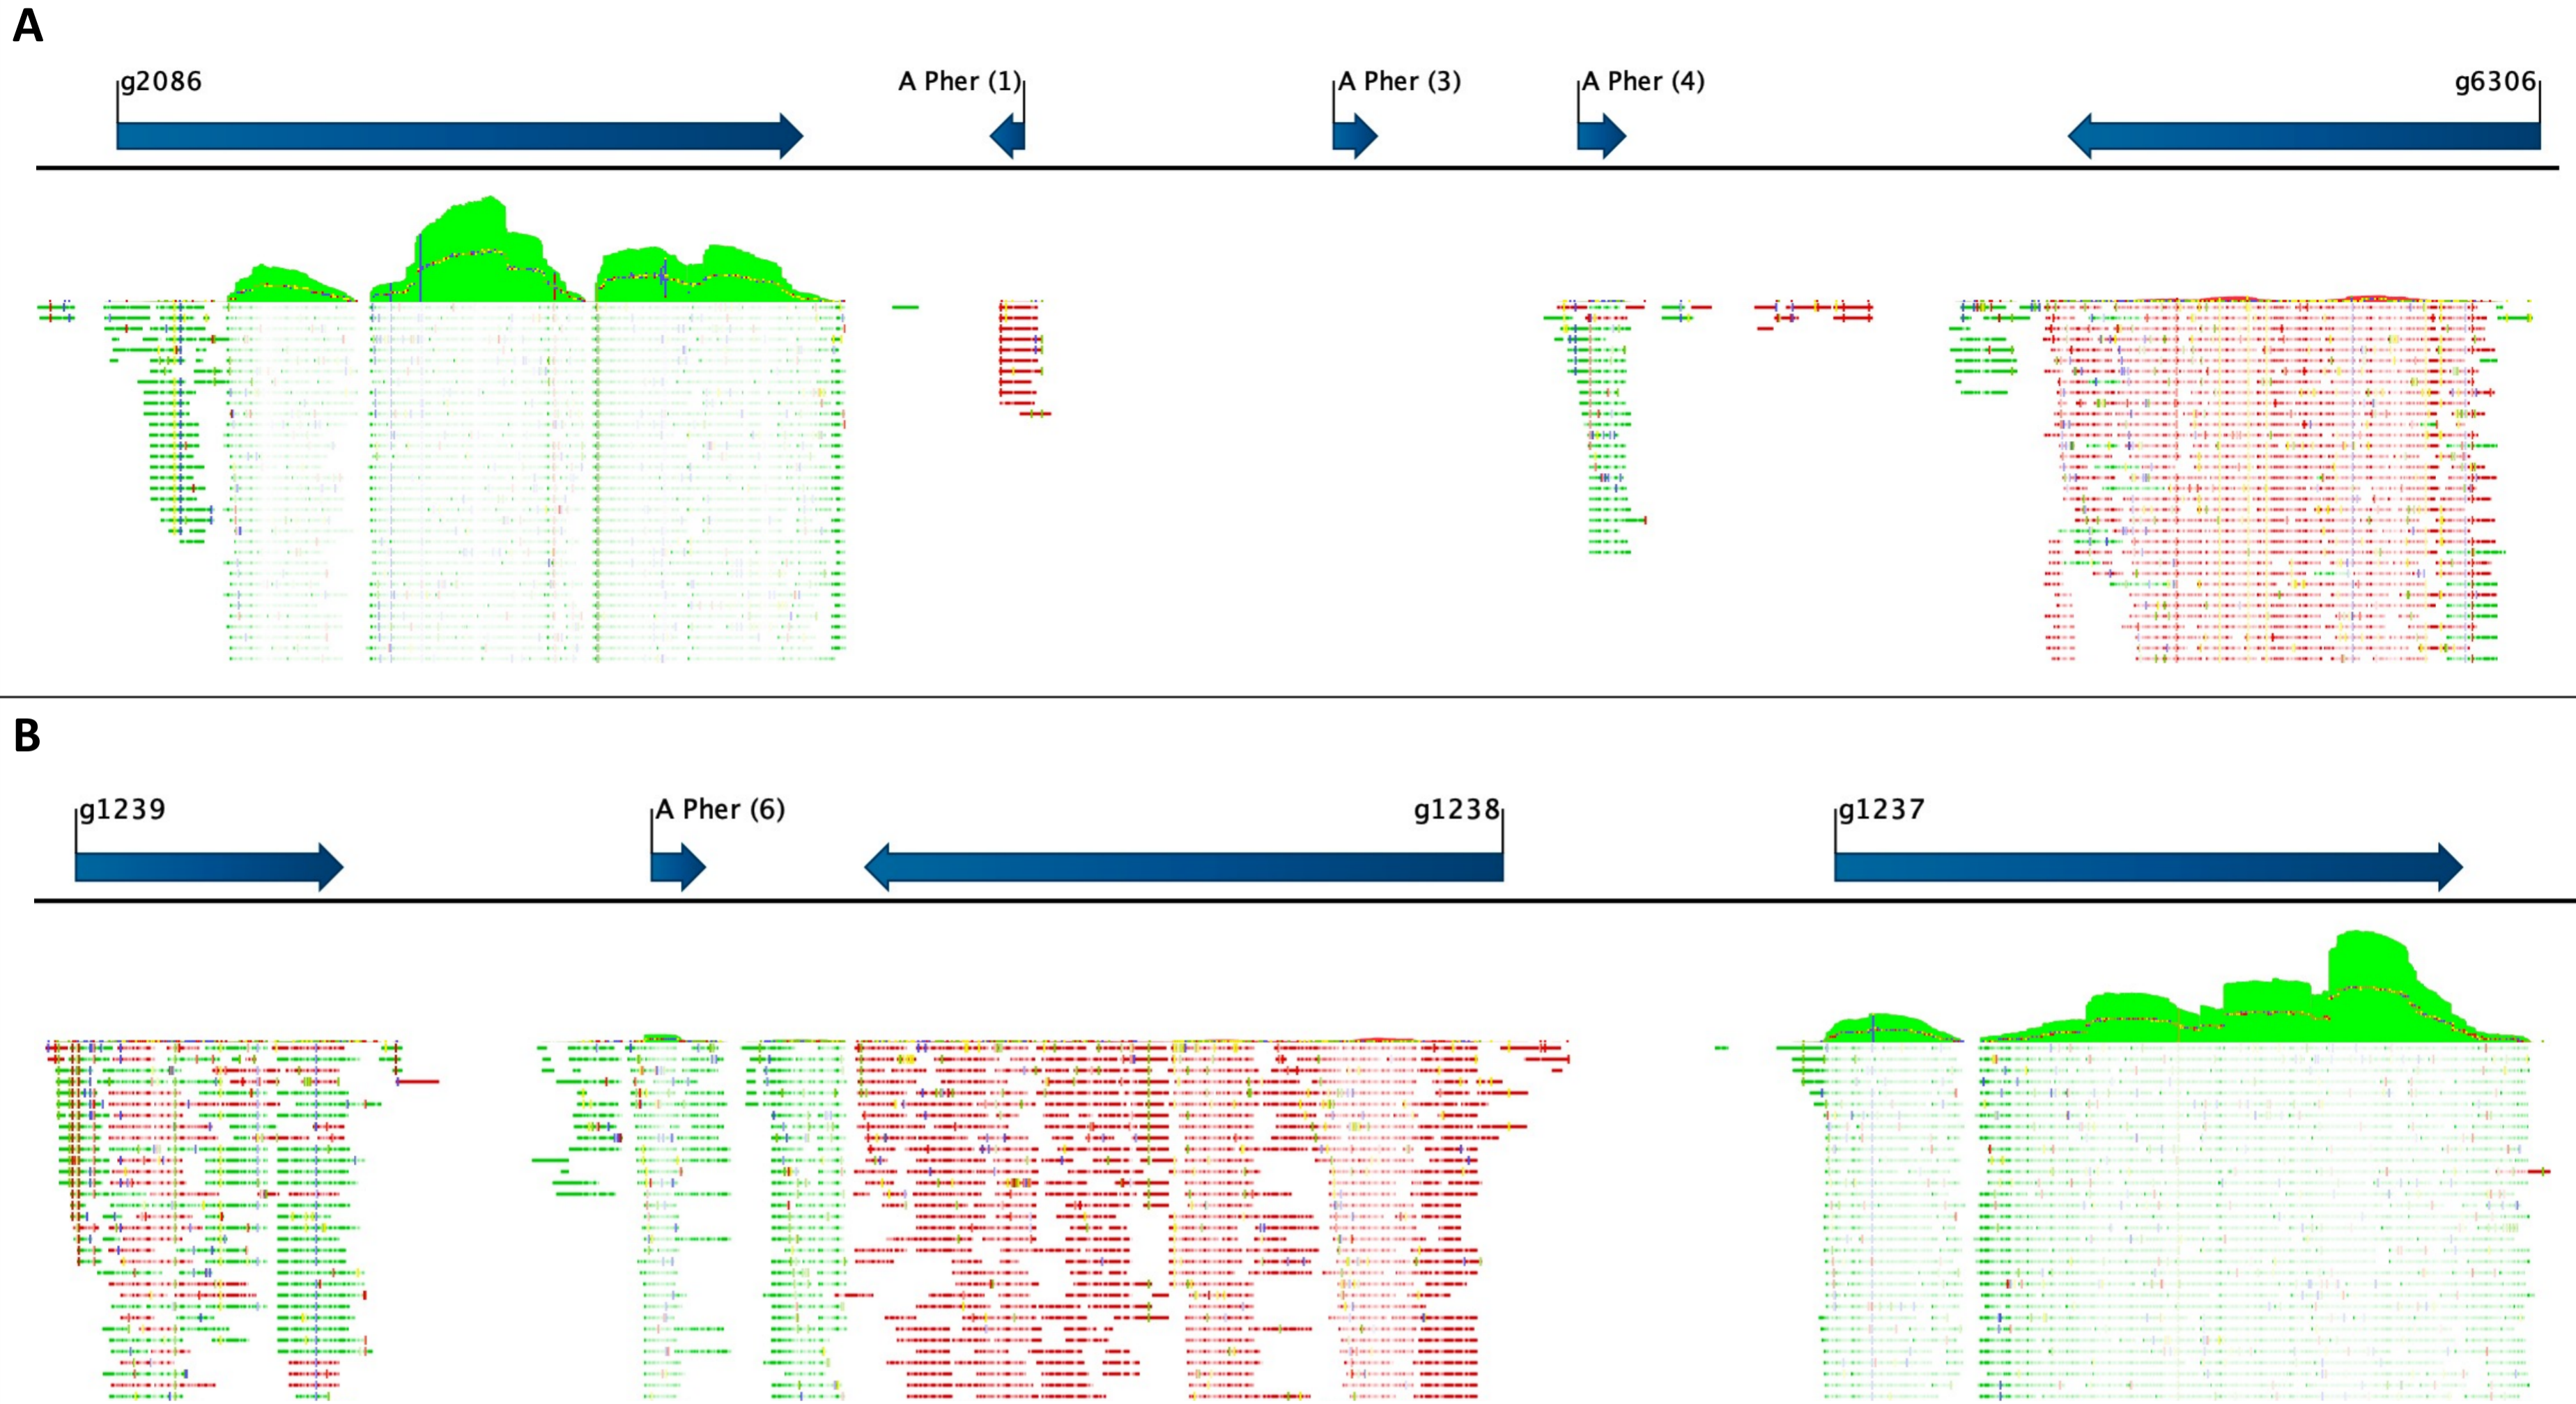

**Fig S8:** RNA mapping to determine expression of the multiple a-factor pheromone genes from *H. moniliformis*. A) Expression of the genes present at the first a-factor pheromone locus. B) Expression of the genes present at the second a-factor pheromone locus. The mappings were produced using the CLC Genomics Workbench V22.0 Map Reads to Contigs function within the De Novo Sequencing module. The parameters were all set to default, except the minimum length and similarity fractions. These values were set to 1.0 and 0.9, respectively.



FIGURE S9

| Species                | Protein structure                                                                    | Repeat sequences                                                                                              | Number of repeats |
|------------------------|--------------------------------------------------------------------------------------|---------------------------------------------------------------------------------------------------------------|-------------------|
| <i>H. abstrusa</i>     |    | <ul style="list-style-type: none"> <li>■ NSNGGLPGELL</li> <li>■ YSNGGLPGELL</li> </ul>                        | 12                |
| <i>H. omanensis</i>    |    | <ul style="list-style-type: none"> <li>■ DSNGGLPGELL</li> <li>■ NSNAGLPGELL</li> <li>■ YSNAGLPGELL</li> </ul> | 8                 |
| <i>H. bhutanensis</i>  |    | <ul style="list-style-type: none"> <li>■ NSNGGLPGELL</li> <li>■ DSNGGLPGELL</li> </ul>                        | 11                |
| <i>H. decipiens</i>    |  | <ul style="list-style-type: none"> <li>■ NSNGGLPGELL</li> <li>■ DSNGGLPGELL</li> </ul>                        | 7                 |
| <i>H. savannae</i>     |  | <ul style="list-style-type: none"> <li>■ NSNGGLPGELL</li> <li>■ DSNGGLPGELL</li> </ul>                        | 10                |
| <i>H. moniliformis</i> |  | <ul style="list-style-type: none"> <li>■ DANGGLPGELF</li> <li>■ DAWGGLPGELF</li> </ul>                        | 6                 |
| <i>H. fecunda</i>      |  | <ul style="list-style-type: none"> <li>■ DANGGLPGELF</li> <li>■ DAWGGLPGELF</li> </ul>                        | 6                 |
| <i>H. tyalla</i> *     |   | <ul style="list-style-type: none"> <li>■ DANGGLPGELF</li> <li>■ DAWGGLPGELF</li> </ul>                        | 6                 |

**Fig S9:** The structure of the *Huntia*  $\alpha$ -factor pheromones from the various *Huntia* species along with the sequences of the putative mature repeats. The signal peptide is represented by the light pink triangle and the repeat units are represented by coloured squares. The structure schematics are not drawn to scale. \* The *H. tyalla*  $\alpha$ -pheromone contig could not be fully assembled.
